# Supplementary material
Source: PubMed Central journal article supplement (PMC7204765)

# THE LANCET

## Supplementary appendix

This appendix formed part of the original submission. We post it as supplied by the authors.

Supplement to: Riphagen S, Gomez X, Gonzalez-Martinez C, Wilkinson N, Theocharis P. Hyperinflammatory shock in children during COVID-19 pandemic. *Lancet* 2020; published online May 6. [http://dx.doi.org/10.1016/S0140-6736\(20\)31094-1](http://dx.doi.org/10.1016/S0140-6736(20)31094-1).

**Figure:** Echocardiogram images showing echo-bright coronary arteries on day1 of admission (left image) and coronary aneurysm day 7 (right image)

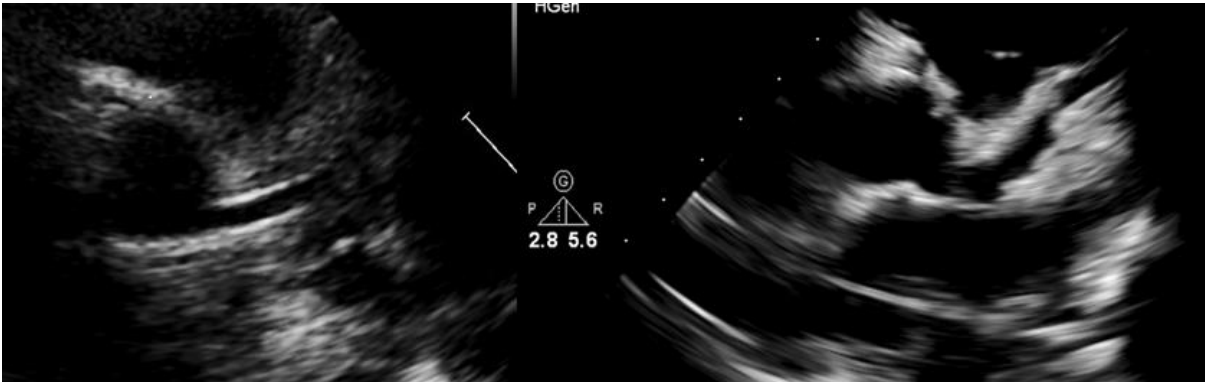

Supplement: mmc1.pdf [file mmc1.pdf]
